# Supplementary material for: Developing and optimizing shrub parameters representing sagebrush ( Artemisia spp.) ecosystems in the northern Great Basin using the Ecosystem Demography (EDv2.2) model
Source: Copernicus journal article supplement (doi:10.5194/gmd-12-4585-2019), 2019-11-05
Supplement: Supplementary file 1 [file gmd-12-4585-2019-supplement.pdf]

Supplement of Geosci. Model Dev., 12, 4585–4601, 2019  
<https://doi.org/10.5194/gmd-12-4585-2019-supplement>  
© Author(s) 2019. This work is distributed under  
the Creative Commons Attribution 4.0 License.

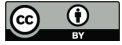

*Supplement of*

**Developing and optimizing shrub parameters representing sagebrush (*Artemisia* spp.) ecosystems in the northern Great Basin using the Ecosystem Demography (EDv2.2) model**

**Karun Pandit et al.**

*Correspondence to:* Karun Pandit ([karunpandit@gmail.com](mailto:karunpandit@gmail.com))

The copyright of individual parts of the supplement might differ from the CC BY 4.0 License.

*Supplement of*

**Developing and optimizing shrub parameters representing sagebrush (*Artemisia* spp.) ecosystems in the Northern Great Basin using the Ecosystem Demography (EDv2.2) model**

**Table S1.** Shrub (sagebrush) PFT parameters used to initialize ED2.

| S.N. | Description of parameter                                                                                       | Value used for sagebrush PFT           | Parameter name used in EDv2.2 | Reasoning / References                                               |
|------|----------------------------------------------------------------------------------------------------------------|----------------------------------------|-------------------------------|----------------------------------------------------------------------|
| 1    | DBH-leaf allometry intercept [kgC/plant]                                                                       | $2.582 \times 10^{-6}$                 | b1Bl_small                    | Based on our allometry equation                                      |
| 2    | DBH-leaf allometry slope                                                                                       | 2.746                                  | b2Bl_small                    | Based on our allometry equation                                      |
| 3    | DBH-stem allometry intercept [kg/plant]                                                                        | $5.709 \times 10^{-8}$                 | b1Bs_small                    | Based on our allometry equation                                      |
| 4    | DBH-stem allometry slope                                                                                       | 4.149                                  | b2Bs_small                    | Based on our allometry equation                                      |
| 5    | DBH-canopy area allometry intercept [m <sup>2</sup> canopy / m <sup>2</sup> ground]                            | $6.35 \times 10^{-5}$                  | b1Ca                          | Based on our allometry equation                                      |
| 6    | DBH-canopy allometry slope                                                                                     | 2.18                                   | b2Ca                          | Based on our allometry equation                                      |
| 7    | Coefficient used to compute the crown length, which is then used to find the height of the bottom of the crown | 1                                      | b1Cl                          | Since shrub crown is close to ground set to 1 (Poorter et al., 2006) |
| 8    | Coefficient used to compute the crown length, which is then used to find the height of the bottom of the crown | 1                                      | b2Cl                          | Since shrub crown is close to ground set to 1 (Poorter et al., 2006) |
| 9    | DBH-height allometry intercept (m)                                                                             | 4.7562                                 | b1Ht                          | Based on our allometry equation                                      |
| 10   | DBH-height allometry slope                                                                                     | -0.002594                              | b2Ht                          | Based on our allometry equation                                      |
| 11   | Root depth from DBH intercept (m)                                                                              | -3.0, if allom = 0, -1.75, if allom >0 | b1Rd                          | Based on Sturges (1977) and Tabler (1964)                            |
| 12   | Root depth from DBH slope                                                                                      | 0.15, if allom =0, 0.10, if allom >0   | b2Rd                          | Based on Sturges (1977) and Tabler (1964)                            |
| 13   | DBH-volume intercept                                                                                           | $2.035 \times 10^{-5}$                 | b1Vol                         | Based on allometry equation                                          |
| 14   | DBH-volume slope                                                                                               | 2.314                                  | b2Vol                         | Based on allometry equation                                          |
| 15   | Wood area index intercept                                                                                      | 0.0192 * 0.5                           | b1WAI                         | Adopted default for broadleaf in EDv2.2                              |
| 16   | Wood area index slope                                                                                          | 1.4648                                 | b2WAI                         | Value of broadleaf divided by 1.43 based on Ahrends et al. 2009      |
| 17   | Factor indicating degree of clumpiness of leaves and shoots ranging between 0 and 1                            | 0.84                                   | clumping_factor               | We used default for hardwood PFTs in EDv2.2                          |

|    |                                                                                                                                |                       |                         |                                             |
|----|--------------------------------------------------------------------------------------------------------------------------------|-----------------------|-------------------------|---------------------------------------------|
| 18 | Intercept of the Ball/Berry stomatal conductance relationship [ $\mu\text{mol}/\text{m}^2/\text{s}$ ]                          | 1000                  | cuticular_cond          | We used default in EDv2.2 for conifer PFTs  |
| 19 | The transpiration control in gsw                                                                                               | 0.016                 | D0                      | Default for all other PFTs in EDv2.2        |
| 20 | Dark respiration factor (gamma). The rate of dark (i.e., leaf) respiration. Dimensionless because it is relative to $V_{m0}$ . | 0.0145                | dark_respiration_factor | Default for most of the PFTs in EDv2.2      |
| 21 | Fraction of litter that goes into labile (fast) carbon pool.                                                                   | 0.79                  | f_labile                | Default for trees in EDv2.2                 |
| 22 | Fire survivorship fraction for trees with heights greater than treefall_hite_threshold                                         | 0                     | fire_s_gtht             | Default for all PFTs in EDv2.2              |
| 23 | Fire survivorship fraction for trees with heights less than treefall_hite_threshold                                            | 0                     | fire_s_ltht             | Default for all PFTs in EDv2.2              |
| 24 | Mortality due to frost. Determines how rapidly trees die if it is too cold for them [1/years]                                  | 3                     | frost_mort              | Default for all PFTs in EDv2.2              |
| 25 | Growth respiration factor, used in growth respiration = (growth_resp_factor) * (P - R <sub>l</sub> - R <sub>r</sub> )          | 0.333                 | growth_resp_factor      | Based on Paembonan et al. 1992              |
| 26 | Maximum height of an individual [m]                                                                                            | 2.5                   | hgt_max                 | Based on field observation                  |
| 27 | Minimum height of an individual [m]                                                                                            | 0.25                  | hgt_min                 | Based on field observation                  |
| 28 | Reference height for diameter/height allometry [m]                                                                             | 0                     | hgt_ref                 | Used only for trees.                        |
| 29 | Fraction of vertical branches (range from -1 to 1)                                                                             | 0.5                   | horiz_branch            | Set to make random arrangement of branches  |
| 30 | Initial plant density in a near-bare-ground run [plant/m <sup>2</sup> ]                                                        | 0.1                   | init_density            | same as trees                               |
| 31 | Emissivity on thermal infrared                                                                                                 | $9.70 \times 10^{-1}$ | leaf_emiss_tir          | Hipps, 1989; default for conifers in EDv2.2 |
| 32 | Leaf reflectance in near infrared spectrum (NIR)                                                                               | $5.77 \times 10^{-1}$ | leaf_reflect_nir        | Based on Qi et al. 2014                     |
| 33 | Leaf reflectance in visible spectrum (PAR)                                                                                     | $3.0 \times 10^{-1}$  | leaf_reflect_vis        | Based on Qi et al. 2014                     |
| 34 | Leaf transmittance in infrared spectrum (NIR)                                                                                  | $2.48 \times 10^{-1}$ | leaf_trans_nir          | Default for trees in EDv2.2                 |
| 35 | Leaf transmittance in visible spectrum (PAR)                                                                                   | $1.6 \times 10^{-1}$  | leaf_trans_vis          | Default for trees in EDv2.2                 |
| 36 | Leaf turn over rate (the inverse of leaf life span) [1/year]                                                                   | 1                     | leaf_turnover_rate      | Based on Miller and Shultz, 1987            |
| 37 | Leaf width [m]                                                                                                                 | 0.05                  | leaf_width              | Default for conifers in EDv2.2              |

|    |                                                                                                                                |       |                         |                                                                                                                        |
|----|--------------------------------------------------------------------------------------------------------------------------------|-------|-------------------------|------------------------------------------------------------------------------------------------------------------------|
| 38 | Adjustment to mortality due to low carbon balance for grasses and tropical plants                                              | 0     | mort0                   | Default for temperate trees in EDv2.2                                                                                  |
| 39 | Parameter controlling the time scale at which plants die out of carbon suffer mortality [1/years]                              | 1     | mort1                   | Default for temperate trees in EDv2.2                                                                                  |
| 40 | Parameter used in calculation of mortality rates due to negative C balance                                                     | 20    | mort2                   | Default for temperate trees in EDv2.2                                                                                  |
| 41 | Controls the density-independent mortality rate due to ageing [1/years]                                                        | 0.001 | mort3                   | Lower value chosen compared to grasses (0.066, from EDv2.2) and temperate trees (0.002 to 0.006) (Medvigy et al. 2009) |
| 42 | Fraction of seed dispersal that is grid cell wide                                                                              | 0.325 | nonlocal_dispersal      | Set this similar to old growth temperate tree in EDv2.2                                                                |
| 43 | Leaf orientation, 0=leaves are randomly oriented; 1=all leaves are perfectly horizontal; 2=all leaves are perfectly vertical.  | 0     | orient_factor           | We used default value for trees in EDv2.2                                                                              |
| 44 | Phenology, 0=evergreen; 1=drought deciduous; 2=cold deciduous; 3=light controlled; 4=drought deciduous based on 10 day average | 0     | phenology               | Based on expert opinion                                                                                                |
| 45 | Minimum temperature below which mortality rapidly increases                                                                    | -80   | plant_min_temp          | Default form other PFTs EDv2.2                                                                                         |
| 46 | Ratio between fine roots and leaves [kg fine roots/kg leaves]                                                                  | 3.2   | q-ratio                 | Poorter et al. 2012, Cleary et al. 2010                                                                                |
| 47 | Efficiency of using PAR to fix CO2 [mol_CO2/Einstein]                                                                          | 0.08  | quantum_efficiency      | We used default for all C3 plants in EDv2.2                                                                            |
| 48 | Fraction of (positive) carbon balance devoted to reproduction                                                                  | 0.3   | r_fract                 | Default from EDv2.2, as other PFTs                                                                                     |
| 49 | Minimum height plants need to attain before allocating reproduction                                                            | 0.25  | repro_min_h             | Field observation / Expert opinion                                                                                     |
| 50 | Wood density [ g/cm <sup>3</sup> ].                                                                                            | 0     | rho                     | Not used for Sagebrush PFT                                                                                             |
| 51 | Factor denoting contribution of roots to respiration [umol_CO2/kg_fine_roots/second]                                           | 0.28  | root_respiration_factor | Default for all PFTs in EDv2.2                                                                                         |
| 52 | Fine root turnover rate (the inverse of fine root life span) [1/year]                                                          | 0.33  | root_turnover_rate      | Inferred from different studies; 0.16-0.54 (Li et al. 2009); 0.34 (Gill and Jackson 2000)                              |

|    |                                                                                                                                 |                         |                       |                                                                 |
|----|---------------------------------------------------------------------------------------------------------------------------------|-------------------------|-----------------------|-----------------------------------------------------------------|
| 53 | Fraction of seedlings that suffer mortality without becoming a recruit                                                          | 0.95                    | seedling_mortality    | Default value in EDv2.2                                         |
| 54 | Specific leaf area [m <sup>2</sup> leaf / kg C]                                                                                 | 4.5                     | SLA                   | Based on Olsoy et al (2016)                                     |
| 55 | Storage fraction                                                                                                                | 0                       | st_fract              | Default from EDv2.2, as other PFTs                              |
| 56 | Slope of the Ball/Berry stomatal conductance-photosynthesis relationship, aka M factor.                                         | 7                       | stomatal_slope        | Default in EDv2.2 for temperate and conifers                    |
| 57 | Turnover rate of plant storage pools [1/year]                                                                                   | 0.6243                  | storage_turnover_rate | Same as for other hardwood PFTs (Medvigy et al, 2009)           |
| 58 | Survivorship fraction for trees with heights greater than treefall height threshold. Used in management/disturbance strategies. | 0                       | treefall_s_gtht       | Default in EDv2.2                                               |
| 59 | Survivorship fraction for trees with heights less than treefall height threshold. Used in management/disturbance strategies.    | 0.1                     | treefall_s_ltht       | Default in EDv2.2                                               |
| 60 | Temperature above which leaf metabolic activity begins to rapidly decline [°C]                                                  | 45                      | Vm_high_temp          | We used default for C3 plants in EDv2.2                         |
| 61 | Temperature below which leaf metabolic activity begins to rapidly decline [°C]                                                  | 4.7137                  | Vm_low_temp           | We used default for C3 plants in EDv2.2                         |
| 62 | Maximum photosynthetic capacity at a 15°C reference temperature [μmol/m <sup>2</sup> /s]                                        | 16.5                    | Vm0                   | Based on average of range cited in Comstock & Ehleringer (1992) |
| 63 | Water dry ratio for leaves                                                                                                      | 2.5                     | wat_dry_ratio_grn     | Default from EDv2.2                                             |
| 64 | Water conductance (m <sup>2</sup> /s/kgC root)                                                                                  | 1.9 X 10 <sup>-5</sup>  | water_conductance     | We used default for trees in EDv2.2                             |
| 65 | Emissivity on thermal infrared                                                                                                  | 9.00 x 10 <sup>-1</sup> | wood_emiss_tir        | Default value for trees in EDv2.2                               |
| 66 | Wood reflectance in near infrared spectrum (NIR)                                                                                | 2.50 x 10 <sup>-1</sup> | wood_reflect_nir      | Default for all other PFTs in EDv2.2                            |
| 67 | Wood reflectance in visible spectrum (PAR)                                                                                      | 1.10 x 10 <sup>-1</sup> | wood_reflect_vis      | Default for woody PFTs in EDv2.2                                |
| 68 | Wood transmittance in infrared spectrum (NIR)                                                                                   | 1.00 x 10 <sup>-1</sup> | wood_trans_nir        | Default for trees in EDv2.2                                     |
| 69 | Wood transmittance in visible spectrum (PAR)                                                                                    | 1.00 x 10 <sup>-1</sup> | wood_trans_vis        | Default for trees in EDv2.2                                     |

**Figure S1.** Relationship between predicted and observed sagebrush height; (a) fitted line for observed vs predicted sagebrush height, (b) standardized residuals. Data provided by Qi et al., (2018).

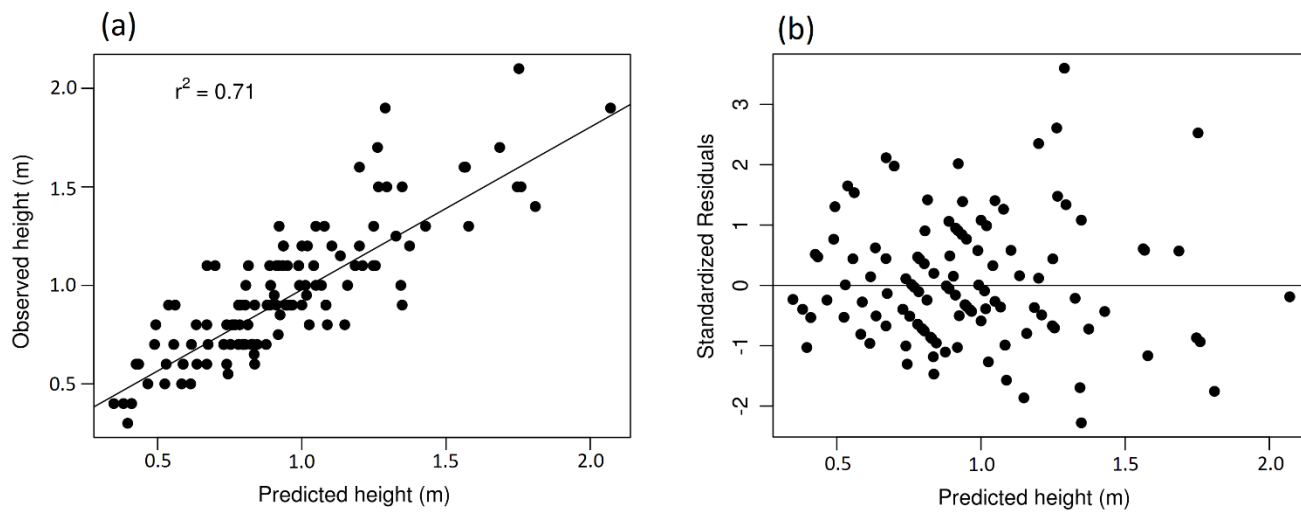

**Table S2.** Predicted GPP, Bias, Standard Deviation, NSE (Nash-Sutcliffe efficiency), and RMSE of ten best simulations (based on final year of simulation) for LS and WBS sites based on GPP observations from respective sites.

a. Ten best simulations for LS site

| S.N. | V <sub>m0</sub><br>( $\mu\text{molm}^{-2}\text{s}^{-1}$ ) | SLA<br>( $\text{m}^2\text{kg}^{-1}$ ) | Stomatal<br>slope | Fine root<br>turnover<br>rate ( $\text{a}^{-1}$ ) | Q-<br>ratio | Calibration                                                              |                                               |                                                 |       |                                               | Validation                                                               |                                               |                                                 |        |                                               |
|------|-----------------------------------------------------------|---------------------------------------|-------------------|---------------------------------------------------|-------------|--------------------------------------------------------------------------|-----------------------------------------------|-------------------------------------------------|-------|-----------------------------------------------|--------------------------------------------------------------------------|-----------------------------------------------|-------------------------------------------------|--------|-----------------------------------------------|
|      |                                                           |                                       |                   |                                                   |             | Estimated<br>mean annual<br>GPP<br>( $\text{kgC}/\text{m}^2/\text{yr}$ ) | Bias<br>( $\text{kgC}/\text{m}^2/\text{yr}$ ) | St Dev<br>( $\text{kgC}/\text{m}^2/\text{yr}$ ) | NSE   | RMSE<br>( $\text{kgC}/\text{m}^2/\text{yr}$ ) | Estimated<br>mean annual<br>GPP<br>( $\text{kgC}/\text{m}^2/\text{yr}$ ) | Bias<br>( $\text{kgC}/\text{m}^2/\text{yr}$ ) | St Dev<br>( $\text{kgC}/\text{m}^2/\text{yr}$ ) | NSE    | RMSE<br>( $\text{kgC}/\text{m}^2/\text{yr}$ ) |
| 1    | 19                                                        | 7.5                                   | 9                 | 0.22                                              | 3.2         | 0.476                                                                    | -0.137                                        | 0.211                                           | 0.277 | 0.456                                         | 0.298                                                                    | -0.252                                        | 0.312                                           | 0.069  | 0.554                                         |
| 2    | 19                                                        | 7.5                                   | 9                 | 0.11                                              | 1.8         | 0.425                                                                    | -0.188                                        | 0.217                                           | 0.273 | 0.457                                         | 0.255                                                                    | -0.295                                        | 0.274                                           | 0.032  | 0.565                                         |
| 4    | 19                                                        | 7.5                                   | 9                 | 0.22                                              | 1.8         | 0.425                                                                    | -0.188                                        | 0.212                                           | 0.271 | 0.458                                         | 0.252                                                                    | -0.298                                        | 0.267                                           | 0.035  | 0.564                                         |
| 3    | 16.5                                                      | 9                                     | 10                | 0.33                                              | 3.2         | 0.401                                                                    | -0.212                                        | 0.232                                           | 0.270 | 0.458                                         | 0.243                                                                    | -0.307                                        | 0.27                                            | -0.014 | 0.579                                         |
| 5    | 19                                                        | 7.5                                   | 9                 | 0.11                                              | 3.2         | 0.423                                                                    | -0.191                                        | 0.211                                           | 0.266 | 0.459                                         | 0.256                                                                    | -0.294                                        | 0.275                                           | 0.025  | 0.567                                         |
| 6    | 21.5                                                      | 7.5                                   | 10                | 0.33                                              | 0.4         | 0.386                                                                    | -0.227                                        | 0.252                                           | 0.251 | 0.464                                         | 0.241                                                                    | -0.309                                        | 0.268                                           | -0.016 | 0.579                                         |
| 7    | 21.5                                                      | 9                                     | 7                 | 0.11                                              | 3.2         | 0.520                                                                    | -0.093                                        | 0.222                                           | 0.249 | 0.464                                         | 0.306                                                                    | -0.244                                        | 0.338                                           | 0.073  | 0.549                                         |
| 8    | 19                                                        | 9                                     | 8                 | 0.22                                              | 3.2         | 0.414                                                                    | -0.199                                        | 0.194                                           | 0.234 | 0.469                                         | 0.254                                                                    | -0.296                                        | 0.271                                           | 0.034  | 0.565                                         |
| 9    | 16.5                                                      | 9                                     | 8                 | 0.11                                              | 0.4         | 0.448                                                                    | -0.165                                        | 0.183                                           | 0.230 | 0.470                                         | 0.278                                                                    | -0.272                                        | 0.235                                           | 0.065  | 0.555                                         |
| 10   | 19                                                        | 7.5                                   | 8                 | 0.11                                              | 0.4         | 0.440                                                                    | -0.173                                        | 0.184                                           | 0.216 | 0.475                                         | 0.279                                                                    | -0.271                                        | 0.228                                           | 0.052  | 0.559                                         |
| Mean | 19                                                        | 8.1                                   | 8.7               | 0.19                                              | 2.08        | 0.438                                                                    | -0.172                                        | 0.203                                           | 0.281 | 0.455                                         | 0.272                                                                    | -0.278                                        | 0.269                                           | 0.053  | 0.559                                         |

5

Note: we used Nash-Sutcliffe Efficiency (NSE) skill score (Nash and Sutcliffe, 1970) to rank the results from simulations using equation below,

$$NSE = 1 - \frac{\sum_{i=1}^n (O_i - P_i)^2}{\sum_{i=1}^n (O_i - \underline{O})^2},$$

where, where,  $O_i$  is observation,  $P_i$  is predicted value,  $\underline{O}$  is mean of observation, and  $n$  is number of observations

b. Ten best simulations for WBS site

| S.N. | $V_{m0}$<br>( $\mu\text{molm}^{-2}\text{s}^{-1}$ ) | SLA<br>( $\text{m}^2\text{kg}^{-1}$ ) | Stomatal<br>slope | Fine root<br>turnover<br>rate ( $\text{a}^{-1}$ ) | Q-<br>ratio | Calibration                                                 |                                       |                                       |       |                                       | Validation                                                  |                                       |                                       |        |                                       |
|------|----------------------------------------------------|---------------------------------------|-------------------|---------------------------------------------------|-------------|-------------------------------------------------------------|---------------------------------------|---------------------------------------|-------|---------------------------------------|-------------------------------------------------------------|---------------------------------------|---------------------------------------|--------|---------------------------------------|
|      |                                                    |                                       |                   |                                                   |             | Estimated                                                   | Bias                                  | St Dev                                | NSE   | RMSE                                  | Estimated                                                   | Bias                                  | St Dev                                | NSE    | RMSE                                  |
|      |                                                    |                                       |                   |                                                   |             | mean annual<br>GPP<br>( $\text{kgC}/\text{m}^2/\text{yr}$ ) | ( $\text{kgC}/\text{m}^2/\text{yr}$ ) | ( $\text{kgC}/\text{m}^2/\text{yr}$ ) |       | ( $\text{kgC}/\text{m}^2/\text{yr}$ ) | mean annual<br>GPP<br>( $\text{kgC}/\text{m}^2/\text{yr}$ ) | ( $\text{kgC}/\text{m}^2/\text{yr}$ ) | ( $\text{kgC}/\text{m}^2/\text{yr}$ ) |        | ( $\text{kgC}/\text{m}^2/\text{yr}$ ) |
| 1    | 19                                                 | 7.5                                   | 9                 | 0.33                                              | 1.8         | 0.321                                                       | -0.028                                | 0.195                                 | 0.452 | 0.213                                 | 0.208                                                       | -0.252                                | 0.246                                 | 0.079  | 0.411                                 |
| 2    | 19                                                 | 7.5                                   | 9                 | 0.22                                              | 0.4         | 0.32                                                        | -0.029                                | 0.213                                 | 0.446 | 0.214                                 | 0.201                                                       | -0.259                                | 0.233                                 | 0.06   | 0.415                                 |
| 4    | 19                                                 | 9                                     | 9                 | 0.22                                              | 0.4         | 0.328                                                       | -0.021                                | 0.206                                 | 0.441 | 0.213                                 | 0.171                                                       | -0.289                                | 0.211                                 | -0.028 | 0.434                                 |
| 3    | 19                                                 | 9                                     | 10                | 0.33                                              | 0.4         | 0.303                                                       | -0.046                                | 0.209                                 | 0.439 | 0.216                                 | 0.176                                                       | -0.284                                | 0.195                                 | -0.011 | 0.429                                 |
| 5    | 19                                                 | 7.5                                   | 9                 | 0.11                                              | 3.2         | 0.321                                                       | -0.028                                | 0.203                                 | 0.435 | 0.217                                 | 0.204                                                       | -0.256                                | 0.238                                 | 0.046  | 0.418                                 |
| 6    | 16.5                                               | 7.5                                   | 9                 | 0.22                                              | 1.8         | 0.321                                                       | -0.028                                | 0.169                                 | 0.426 | 0.218                                 | 0.193                                                       | -0.267                                | 0.214                                 | 0.020  | 0.423                                 |
| 7    | 19                                                 | 7.5                                   | 9                 | 0.11                                              | 1.8         | 0.311                                                       | -0.038                                | 0.229                                 | 0.425 | 0.218                                 | 0.203                                                       | -0.257                                | 0.24                                  | 0.069  | 0.413                                 |
| 8    | 19                                                 | 7.5                                   | 9                 | 0.22                                              | 3.2         | 0.312                                                       | -0.037                                | 0.174                                 | 0.411 | 0.221                                 | 0.199                                                       | -0.261                                | 0.223                                 | 0.022  | 0.423                                 |
| 9    | 16.5                                               | 9                                     | 9                 | 0.22                                              | 1.8         | 0.333                                                       | -0.016                                | 0.237                                 | 0.408 | 0.222                                 | 0.199                                                       | -0.261                                | 0.226                                 | 0.045  | 0.418                                 |
| 10   | 16.5                                               | 9                                     | 9                 | 0.33                                              | 3.2         | 0.319                                                       | -0.03                                 | 0.174                                 | 0.405 | 0.222                                 | 0.200                                                       | -0.26                                 | 0.223                                 | 0.019  | 0.424                                 |
| Mean | 18.25                                              | 8.1                                   | 9.1               | 0.23                                              | 1.8         | 0.319                                                       | -0.03                                 | 0.197                                 | 0.429 | 0.217                                 | 0.195                                                       | -0.265                                | 0.224                                 | 0.036  | 0.420                                 |



**Figure S2.** Mean monthly GPP estimation from the ten best simulations (based on NSE) for each of EC stations; (a) LS and (b) WBS, for 15 years.

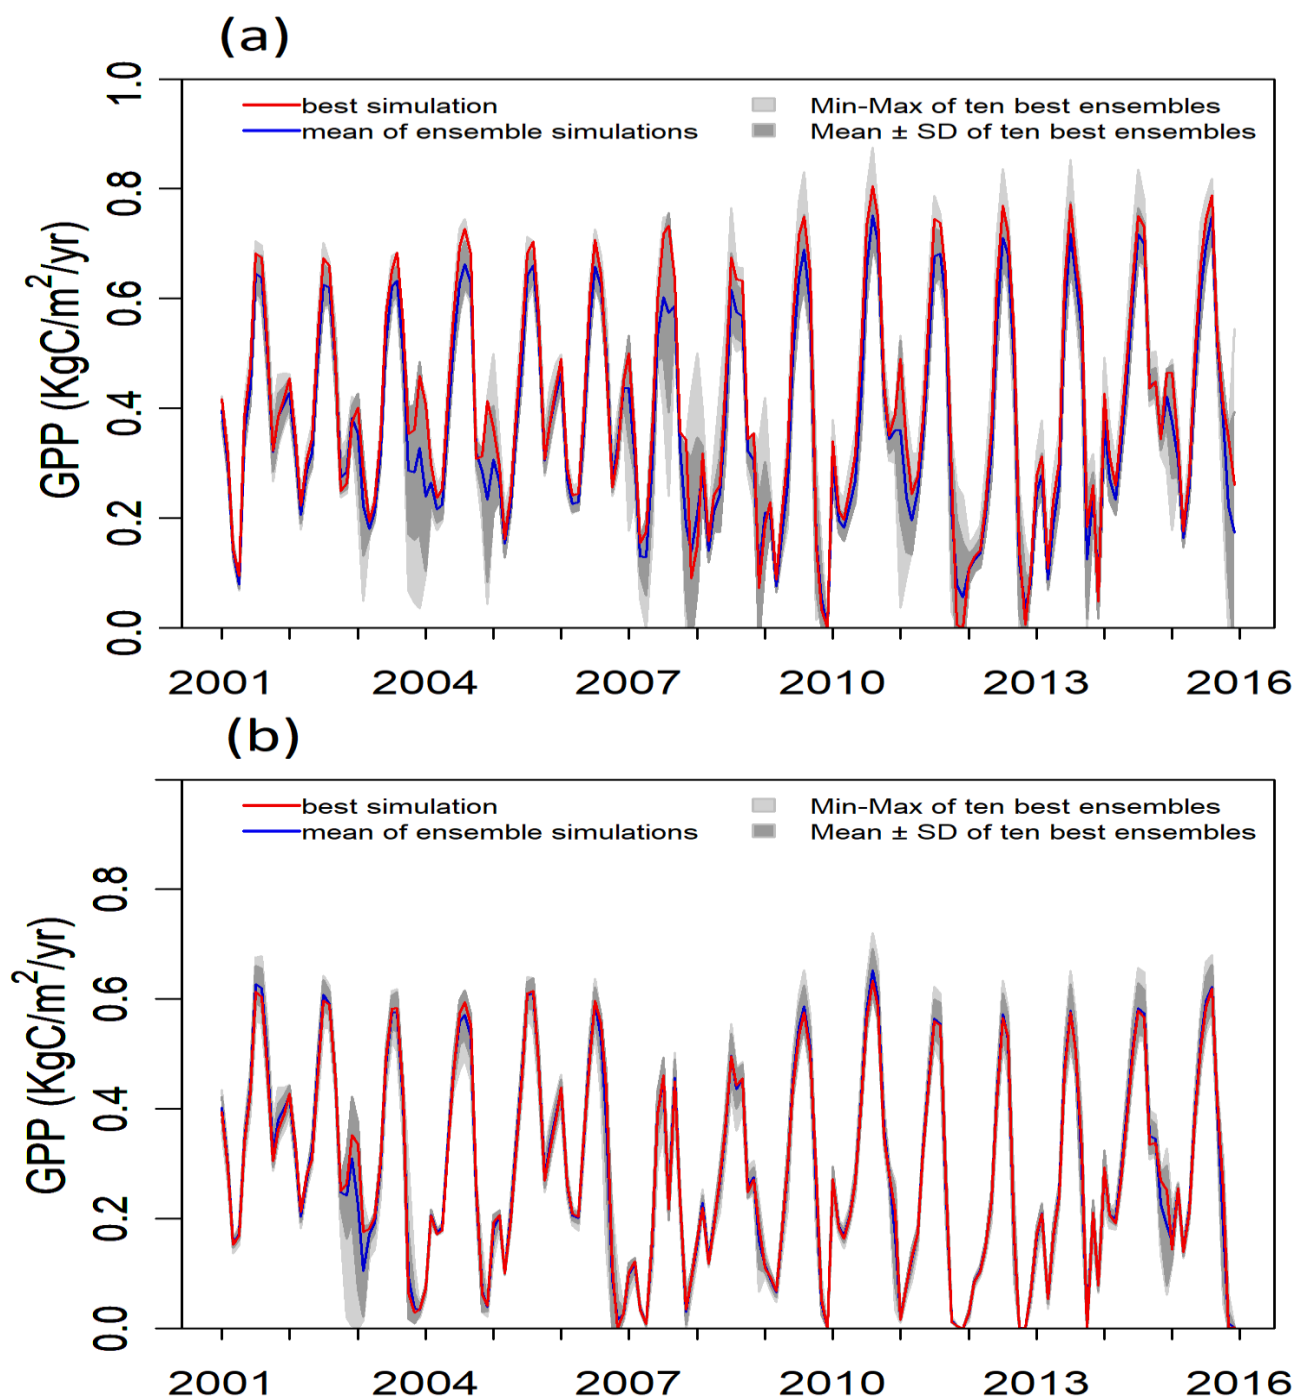

**Fig S3.** Daily GPP simulated by best cases for (a) LS and (b) WBS sites, dissected into shrub and C3 grass PFTs for final 10 simulation years. C3 grass was plotted at narrower GPP range to make it visible in the figure.

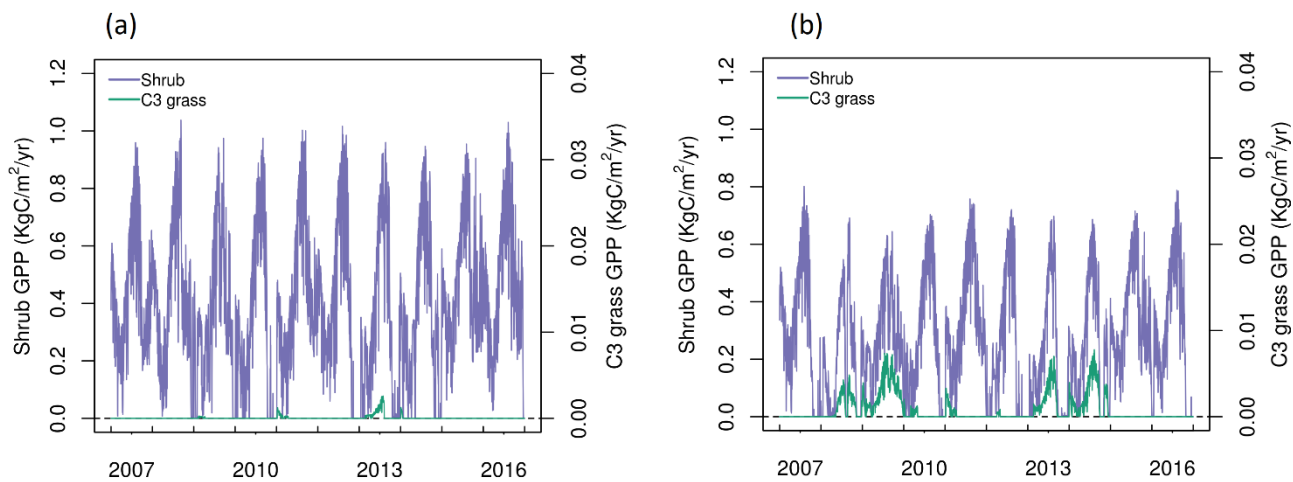

5

## Reference

- Ahrends, H. E., S. Etzold, W. L. Kutsch, R. Stockli, R. Bruegger, F. Jeanneret, H. Wanner, N. Buchmann, and W. Eugster. Tree phenology and carbon dioxide fluxes: use of digital photography for process-based interpretation of the ecosystem scale. *Climate Research* 39:261–274, 2009. AmeriFlux: <http://ameriflux.lbl.gov>, last access: 7 May 2018.
- 5 Cleary, M. B., Pendall, E., and Ewers, B. E.: Aboveground and belowground carbon pools after fire in mountain big sagebrush steppe, *Rangel Ecol. Manag.*, 63, 187–96, doi.org/10.2111/REM-D-09-00117.1, 2010.
- Comstock, J.P. and Ehleringer, J.R.: Plant adaptation in the Great Basin and Colorado Plateau, *Great Basin Naturalist*, 52, 195-215, 1992.
- Gill, R.A. and Jackson, R. B.: Global patterns of root turnover for terrestrial ecosystems, *New Phytol.*, 147, 13-31, doi.org/10.1046/j.1469-8137.2000.00681.x, 2000.
- 10 Higgs, L. E.: The infrared emissivities of soil and *Artemisia tridentata* and subsequent temperature corrections in a shrub-steppe ecosystem. *Remote Sensing of Environment*, 27, 337–342, 1989.
- Li, C., Sun, O. J., Xiao, C., and Han, X.: Differences in Net Primary Productivity Among Contrasting Habitats in *Artemisia ordosica* Rangeland of Northern China. *Rangeland Ecol Manage.*, 62, 345-350, <https://doi.org/10.2111/07-084.1>, 2009.
- 15 Medvigy, D., Wofsy, S. C., Munger, J. W., Hollinger, D. Y., and Moorcroft, P. R.: Mechanistic scaling of ecosystem function and dynamics in space and time: Ecosystem Demography model version 2, *J. Geophys. Res.*, 114, G01002, doi:10.1029/2008JG000812, 2009.
- Miller, R.F. and Schultz, L. M.: Relationship of western juniper stem conducting tissue and basal circumference to leaf area and biomass. *Great Basin Nat.* 47, 349 – 354, 1987.
- 20 Olsoy, P. J., Mitchell, J. J., Levia, D. F., Clark, P. E., Glenn, N. F.: Estimation of big sagebrush leaf area index with terrestrial laser scanning, *Ecological Indicators*, 61, 815–821, <https://doi.org/10.1016/j.ecolind.2015.10.034>, 2016.
- Paembonan, S.A., Hagihara, A. and Hozumi, K.: Long-term respiration in relation to growth and maintenance processes of the aboveground parts of a hinoki forest tree, *Tree Physiol.* 10, 101-110, 1992.
- Poorter, L., Bongers, L. and Bongers, F.: Architecture of 54 moist forest tree species: traits, trade-offs, and functional groups. *Ecology* 87(5), 1289– 1301, 2006.
- 25 Poorter, H., Niklas, K. J., Reich, P. B., Oleksyn, J., Poot, P. and Mommer, L.: Biomass allocation to leaves, stems, and roots: meta-analyses of interspecific variation and environmental control, *New Phytologist*, 193, 30-50, <https://doi.org/10.1111/j.1469-8137.2011.03952.x>, 2012.
- Qi, Y., Dennison, P. E., Jolly, W. M, Kropp, R. C., and Brewer, S. C.: Spectroscopic analysis of seasonal changes in live fuel moisture content and leaf dry mass, *Remote Sensing of Environment*, 150, 198-206, <https://doi.org/10.1016/j.rse.2014.05.004>, 2014.
- 30 Qi, Y., Ustin, S. L., and Glenn, N. F.: Imaging Spectroscopic Analysis of Biochemical Traits for Shrub Species in Great Basin, USA, *Remote Sens.*, 10, 1621; doi:10.3390/rs10101621, 2018.

Sturges, D. L.: Soil water withdrawl and root characteristics of Big Sagebrush. *The American Midland Naturalist*, 98, 257-274, 1977.

Tabler, R. D.: The root system of *Artemisia tridentata* at 9,500 feet in Wyoming. *Ecology* 45 (3), 633-636, 1964.
